# Supplementary material for: Novel energy relay dyes for high efficiency dye-sensitized solar cells
Source: Royal Society of Chemistry journal article supplement (doi:10.1039/c4nr06645f), 2015-01-01
Supplement: c4nr06645f1.pdf [file c4nr06645f1.pdf]

## Supporting Information

### Novel Energy Relay Dyes for High Efficiency Dye-Sensitized Solar Cells

**Md. Mahbubur Rahman<sup>a</sup>, Min Jae Ko<sup>b</sup>, and Jae-Joon Lee<sup>a\*</sup>**

*<sup>a</sup>Nanotechnology Research Center and Department of Applied Life Science, College of Biomedical and Health Science, Konkuk University, Chungju 380-701, Republic of Korea*

*<sup>b</sup>Photo-Electronic Hybrids Research Center, Korea Institute of Science and Technology (KIST), Seoul 136-791, Republic of Korea*

\*Address correspondence to [jjlee@kku.ac.kr](mailto:jjlee@kku.ac.kr) (J.-J. Lee).

## Materials

HPLC and TLC grade of 4',6-diamidino-2-phenylindole (DAPI), 2'-(4-ethoxyphenyl)-5-(4-methyl-1-piperazinyl)-2,5'-bi-1H-benzimidazole tri-hydrochloride (H33342), 3,6-bis-diethylamino-9-(2',4'-disulfophenyl)-xanthylium-sodium (sulforhodamine B sodium, SRB), and 2',4',5',7'-Tetrabromofluorescein (Eosin-Y) were purchased from Sigma-Aldrich. The electrolytes were prepared by dissolving 0.6 M 1,2-dimethyl-3-propylimidazolium iodide (DMPII, Solaronix SA), 0.1 M lithium iodide (LiI), 0.05 M iodine (I<sub>2</sub>), and 0.5 M 4-*tert*-butylpyridine (tBP) in 3-methoxypropionitrile (MPN) along with different concentrations of the energy relay dyes (ERDs).

## Instrumentation

UV-Vis absorption and emission spectra were measured by a spectrophotometer (Perkin Elmer, Lambda 35, USA) and spectrofluorometer (Horiba, Fluorolog-3, USA), respectively. Electrochemical experiments were performed using a potentiostat (CHI430A, CH Instruments Inc., USA). A conventional three-electrode system was used; where a platinum electrode (3 mm diameter), a platinum wire, and a Ag/Ag<sup>+</sup> were used as working, counter, and reference electrode, respectively. A solar simulator equipped with a 200 W Xenon lamp (McScience, Polaronix<sup>®</sup> K201) was used to generate simulated light AM 1.5. A photovoltaic power meter (McScience, Polaronix<sup>®</sup> K101 LAB20) was used to measure the current density-voltage (*J-V*) curves. The incident light intensity was adjusted to 100 mWcm<sup>-2</sup> (1 sun) by a standard mono-Si solar cell (PV Measurement Inc, PVM 396) certified by the U.S. National Renewable Energy Laboratory. Incident-photon-to-current conversion efficiency (IPCE) spectra were measured by an IPCE measurement system (McScience, Polaronix<sup>®</sup> K3100) with 300 W xenon light source. The

intensity of the incident monochromatic light was also calibrated with the same standard mono-Si solar cell. Electrochemical impedance spectra (EIS) were obtained under open-circuit and dark conditions at frequencies of  $10^5$  - 0.1 Hz with a 5 mV ac amplitude (Zahner-Elektrik GmbH & Co. KG, IM6ex). The measured spectra were fitted to an equivalent circuit appropriate for DSSCs using Z-view software (Scribner Associates Inc., version 3.1).

### **Device fabrication**

Fluorine-doped Tin Oxide (FTO) glass plates (Pilkington TEC Glass-TEC 8, Solar, 2.3 mm thickness) were cleaned in a detergent solution using an ultrasonic bath for 30 min and then rinsed with water and ethanol. The FTO glass plates were immersed in  $\text{TiCl}_4$  (40 mM) at 70 °C for 30 min and washed with water and ethanol. A transparent nanocrystalline  $\text{TiO}_2$  layer on the FTO glass plates was prepared by screen printing  $\text{TiO}_2$  paste (TTPH-20N, ENBKOREA Co., Ltd., Korea, particle size 20 nm) and then drying at 120 °C. The  $\text{TiO}_2$  electrodes were gradually heated under an air flow at 350 °C for 5 min, at 375 °C for 5 min, at 450 °C for 15 min, and at 500 °C for 15 min. A paste for the scattering layer containing 500 nm anatase particles (STP-500N, ENBKOREA Co., Ltd., Korea) was deposited by screen printing and then dried for 1 h at 120 °C. Then, the  $\text{TiO}_2$  electrodes were gradually heated under an air flow at 350 °C for 5 min, at 375 °C for 5 min, at 450 °C for 15 min, and at 500 °C for 15 min. The resulting layer was composed of a 6  $\mu\text{m}$  thick transparent layer and a 4  $\mu\text{m}$  thick scattering layer. The  $\text{TiO}_2$  electrodes were treated again with  $\text{TiCl}_4$  at 70 °C for 30 min and sintered at 500 °C for 30 min.

The  $\text{TiO}_2$  electrodes were dipped separately into 0.4 mM ethanolic solution of N719 (Solaronix SA) for 20 h. The N3, Ru505, and Z907 sensitized  $\text{TiO}_2$  photoelectrodes were

prepared as same. The ERDs were adsorbed on TiO<sub>2</sub> and the N719-loaded TiO<sub>2</sub> from their 1 mM ethanolic solutions for 20 h and 6 h, respectively.

The counter electrodes were prepared by spin coating of 5 mM ethanolic solution of chloroplatinic acid hexahydrate (H<sub>2</sub>PtCl<sub>6</sub>·6H<sub>2</sub>O) on FTO and sintered in an electric muffle furnace at 400 °C for 20 min. The dye loaded photoelectrodes (active area *ca.* 0.2 cm<sup>2</sup>) and Pt counter electrodes were sandwiched by heating at 80 °C with a hot-melt film (60 μm thickness, Surlyn) as a spacer between the electrodes. The liquid-type electrolyte with/without ERDs was injected directly into the cell through the drilled holes at the counter electrode and the holes were temporarily sealed with transparent scotch tape.

### Quantum yield (Q<sub>d</sub>) calculation

Fluorescence quantum yield (Q<sub>d</sub>) is the ratio of photons absorbed to photons emitted through fluorescence, which was calculated for the ERDs by the procedure reported elsewhere.<sup>S1</sup> Briefly, Eosin-Y and SRB were selected as two standard compounds. Figure S1 shows the plot of the absorbance vs. the integrated fluorescence intensity of DAPI, H33342, SRB, and Eosin-Y. Using the two standard samples and their reported Q<sub>d</sub> values (Eosin-Y, Q<sub>d</sub> = 0.67, SRB, Q<sub>d</sub> = 0.91),<sup>S2, S3</sup> the Q<sub>d</sub> values of Eosin-Y and SRB were determined to be 0.63 and 0.917, respectively according to the equation S1.

$$Q_x = Q_{ST} \left( \frac{\text{Grad}_x}{\text{Grad}_{ST}} \right) \left( \frac{\eta_x}{\eta_{ST}} \right)^2 \quad (\text{S1})$$

where, the subscripts ST and X denote standard and test respectively, *Grad* the gradient, and  $\eta$  the refractive index of the solvent.

Therefore, calculating the *Grad* of the plot of absorbance vs. integrated fluorescence intensity of DAPI and H33342 and cross-calibrated by two standards, the  $Q_d$  values was determined to be 0.69 and 0.63, respectively, which is high enough to obtain a reasonable Förster radius ( $R_0$ ) between the ERDs and N719.

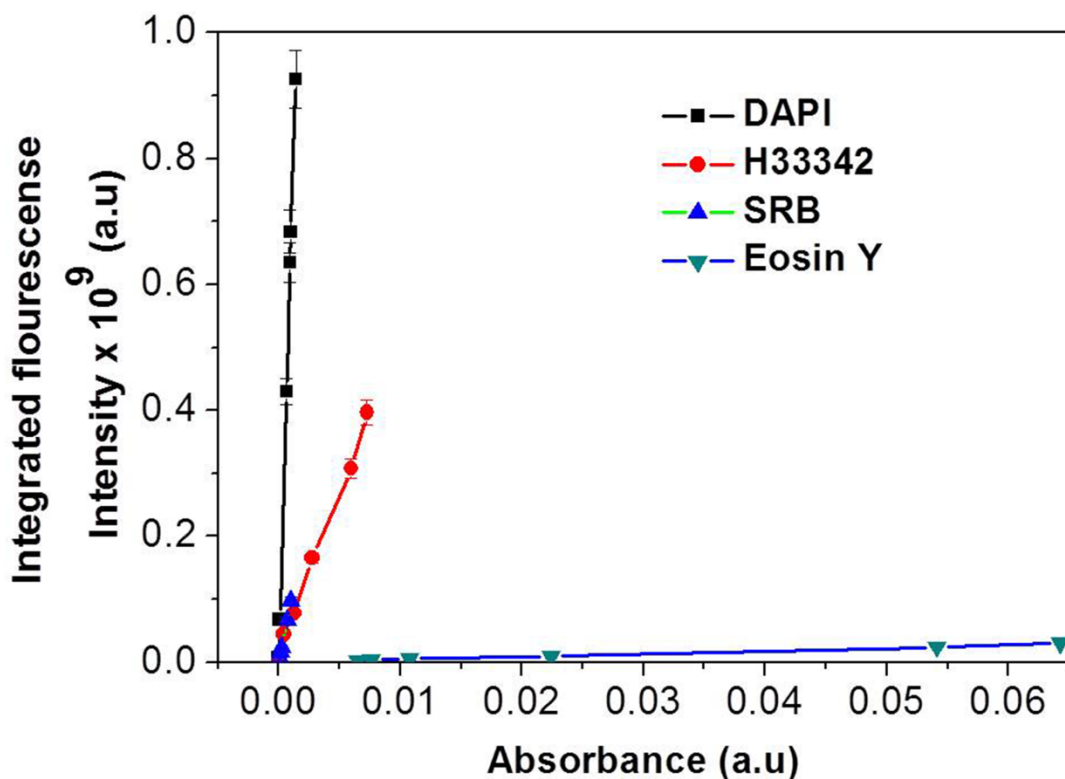

**Figure S1:** Plots of  $\lambda_{\max, \text{abs.}}$  vs. integrated fluorescence intensity of different concentration of the ERDs.

### Förster radius ( $R_0$ ) calculation

Förster radius ( $R_0$ ) illustrates the donor-acceptor separation at which the energy transfer efficiency is 50%, which was calculated according to the equation S2<sup>S4</sup> between the ERDs and N719.

$$R_0^6 = 8.79 \times 10^{-25} \left\{ Q_d k^2 n^{-4} J \right\} \text{ cm}^6 \quad (\text{S2})$$

Where,  $J = \int F_D \varepsilon_A(\lambda) \lambda^4 d\lambda$  in  $\text{M}^{-1} \text{ cm}^3$

Using the calculated spectral overlap ( $J$ ),  $Q_d$ , and the reported orientation factor for the dipole moment ( $k^2$ ) =  $2/3$ ,<sup>S4</sup> and refractive index ( $n$ ) = 1.5 for DSSCs,<sup>S4</sup> the calculated  $R_0$  for the N719/DAPI, N719/H33342 pairs were 2.14 and 1.93 nm, respectively, which is favorable for high energy transfer efficiency between the ERDs and N719.

### **Optimization of the ERDs concentration**

The  $J-V$  characteristics of DSSCs with different concentrations of DAPI and H33342 as additive in the electrolytes are shown in Figure S2. The maximum power conversion efficiency (PCE) was attained using 5 mM DAPI and H33342, and considered as optimal concentration.

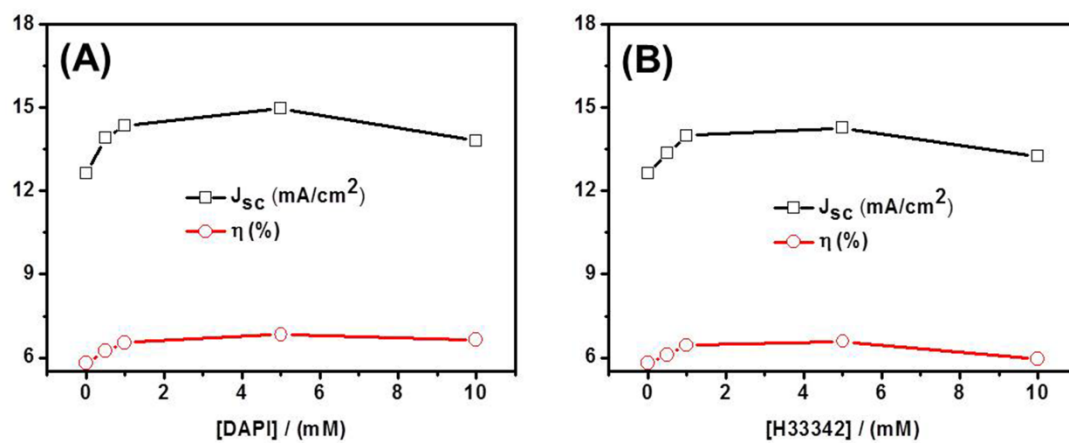

**Figure S2:** Photocurrent density-voltage ( $J$ - $V$ ) characteristics of DSSCs with different concentrations of DAPI and H33342 in electrolytes. The thicknesses of the nanocrystalline  $\text{TiO}_2$  photoelectrodes were *ca.* 5  $\mu\text{m}$ .

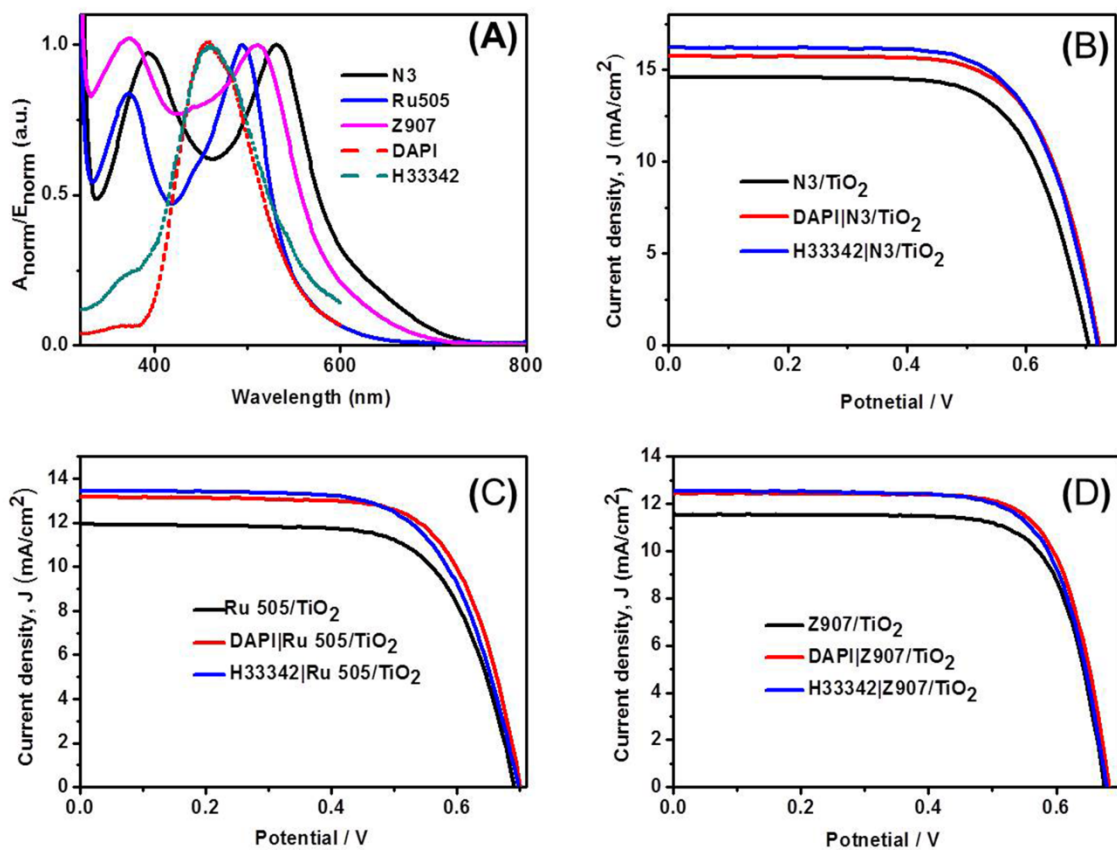

**Figure S3:** Normalized absorption spectra of N3, Ru505, and Z907 dyes together with the emission spectra of DAPI and H33342 (A), and the Current density-voltage ( $J$ - $V$ ) plots of N3, Ru505, and Z907 sensitized DSSCs with/without ERDs added into  $I^-/I_3^-$  based electrolyte (B-D).



## References

- S1.** A. T. R. Williams, S. A. Winfield and J. N. Miller, *Analyst*, 1983, **108**, 1067–1071.
- S2.** H. Du, R. A. Fuh, J. Li, A. Corkan and J. S. Lindsey, *Photochem. Photobiol.*, 1998, **68**, 141–142.
- S3.** M. Dashtiev, V. Azov, V. Frankevich, L. Scharfenberg, and R. Zenobi, *J. Am. Soc. Mass Spectrom.*, 2005, **16**, 1481–1487.
- S4.** J.-H. Yum, B. E. Hardin, S.-J. Moon, E. Baranoff, F. Nüesch, M. D. McGehee, M. Grätzel and M. K. Nazeeruddin, *Angew. Chem. Int. Ed.*, 2009, **48**, 9277–9280.
